# Supplementary material
Source: PubMed Central journal article supplement (PMC7695089)

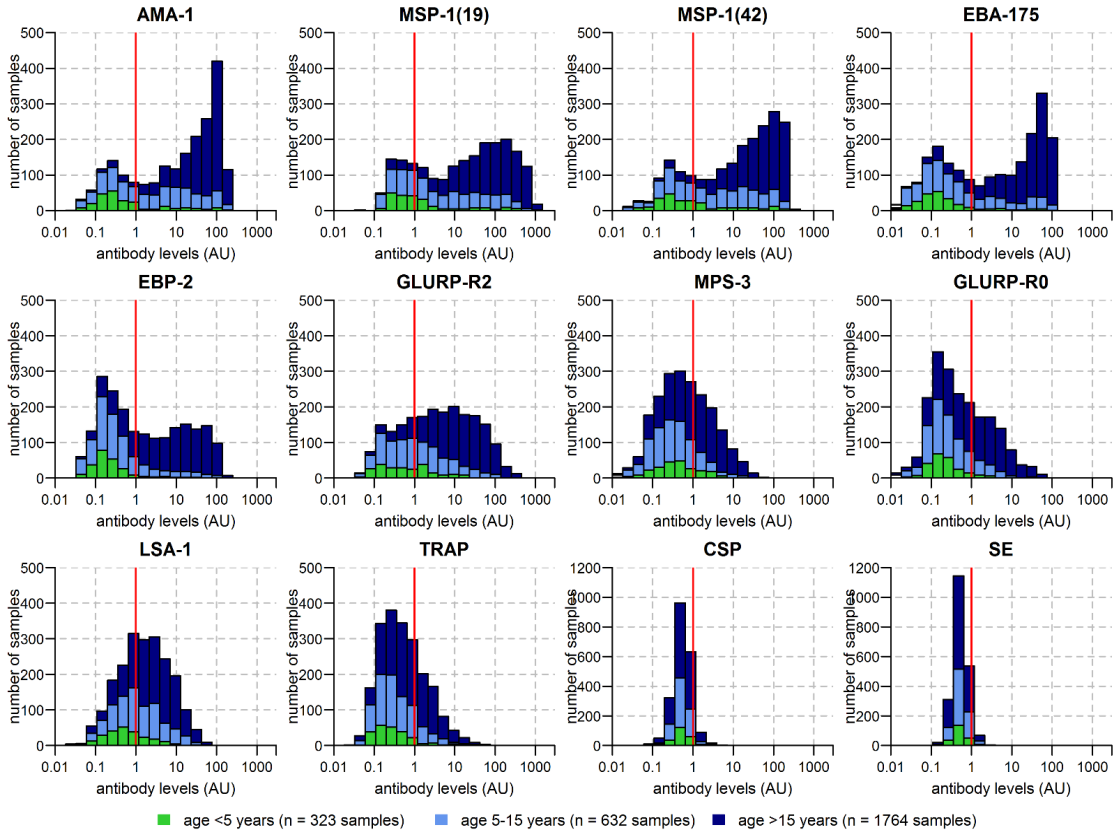

Supplement: tpmd190480.SD2.pdf [file tpmd190480.SD2.pdf]

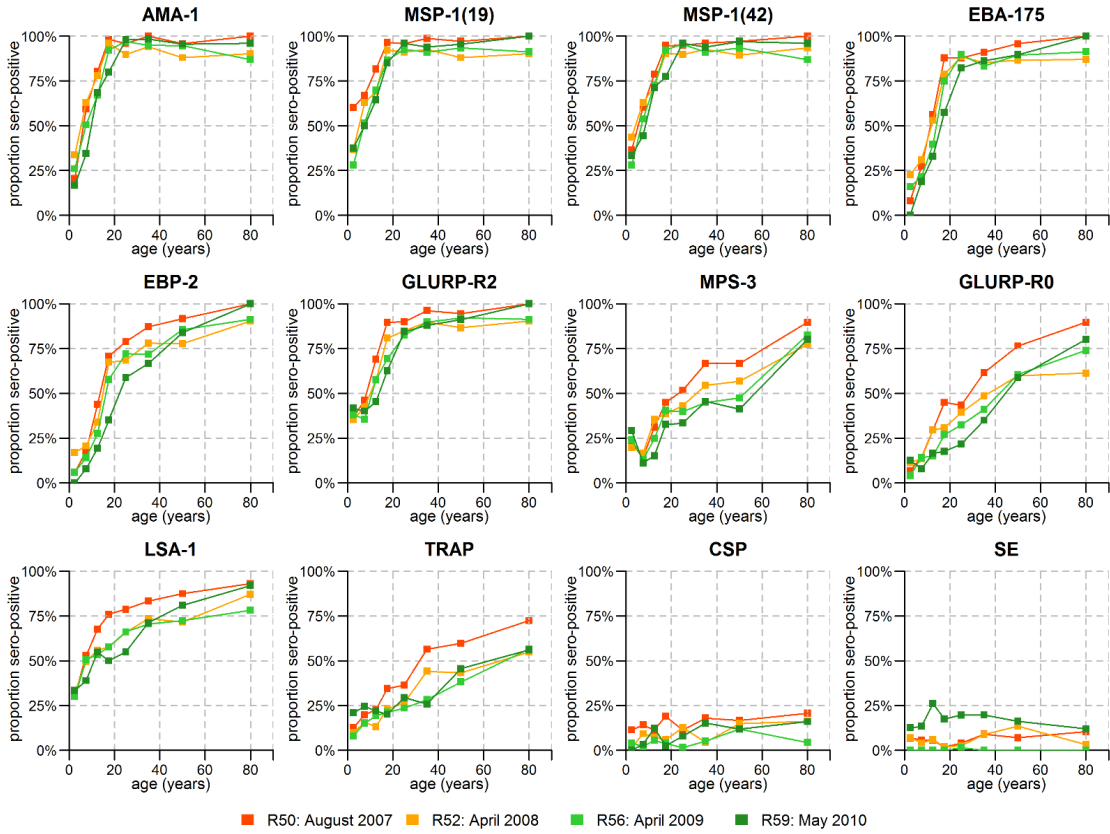

Supplement: tpmd190480.SD4.pdf [file tpmd190480.SD4.pdf]

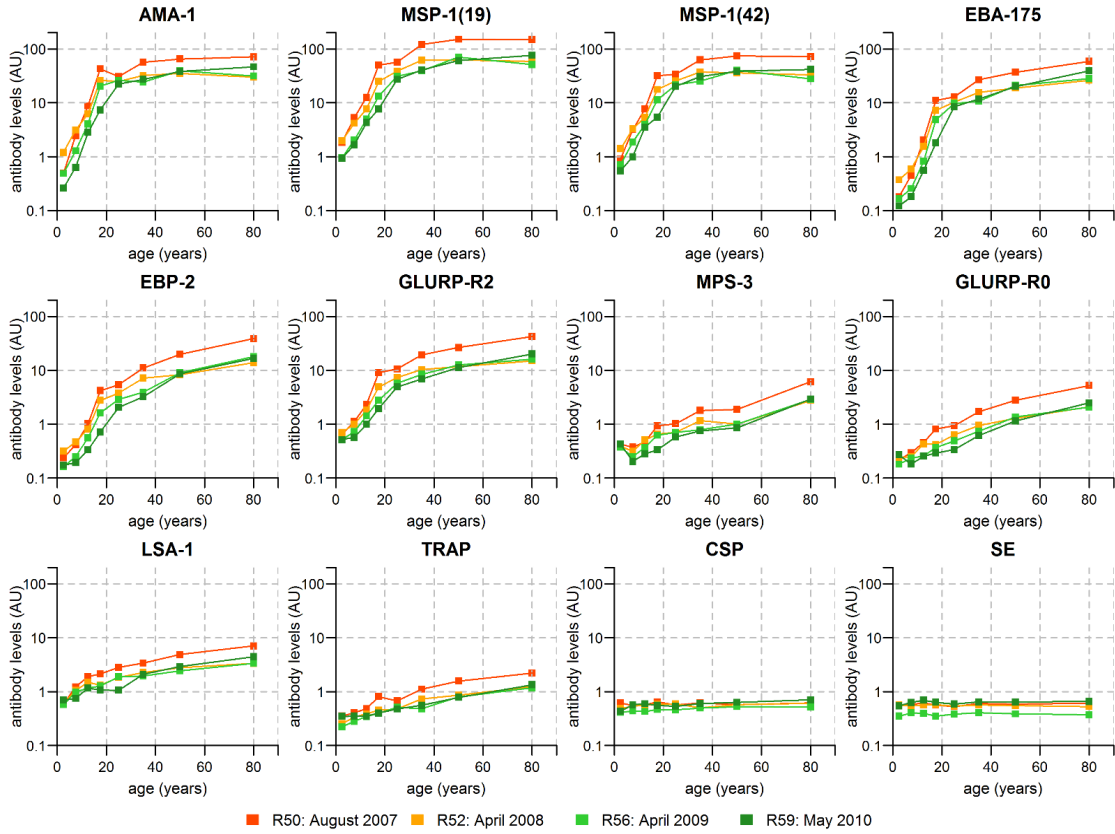

Supplement: tpmd190480.SD5.pdf [file tpmd190480.SD5.pdf]

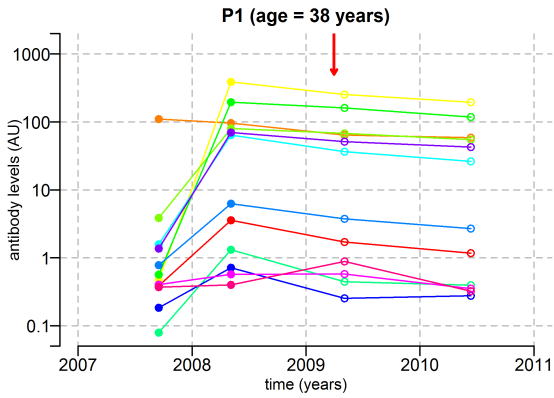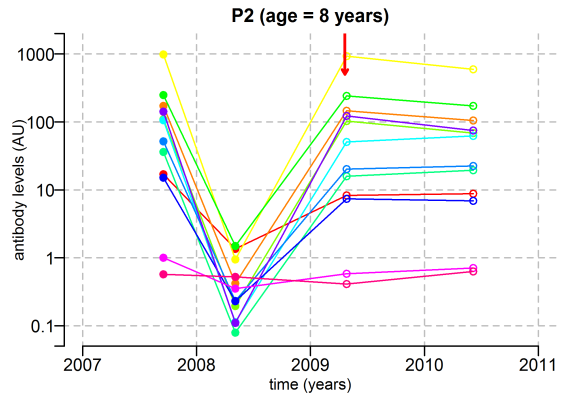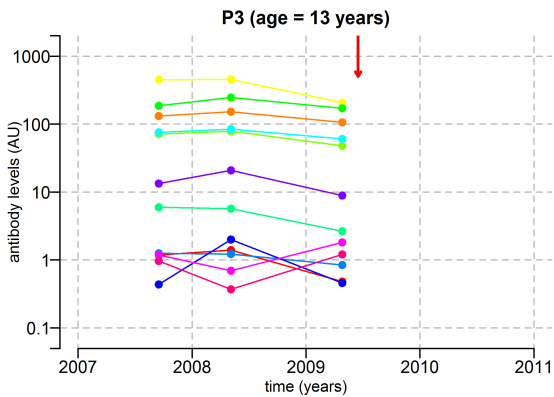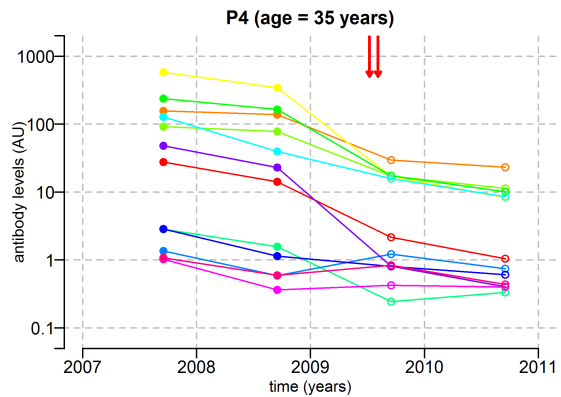

- AMA-1
- MSP-1(19)
- MSP-1(42)
- EBA-175
- EBP-2
- GLURP-R2
- MPS-3
- GLURP-R0
- LSA-1
- TRAP
- CSP
- SE

Supplement: tpmd190480.SD6.pdf [file tpmd190480.SD6.pdf]

### Antibody half-life vs sero-positivity half-life

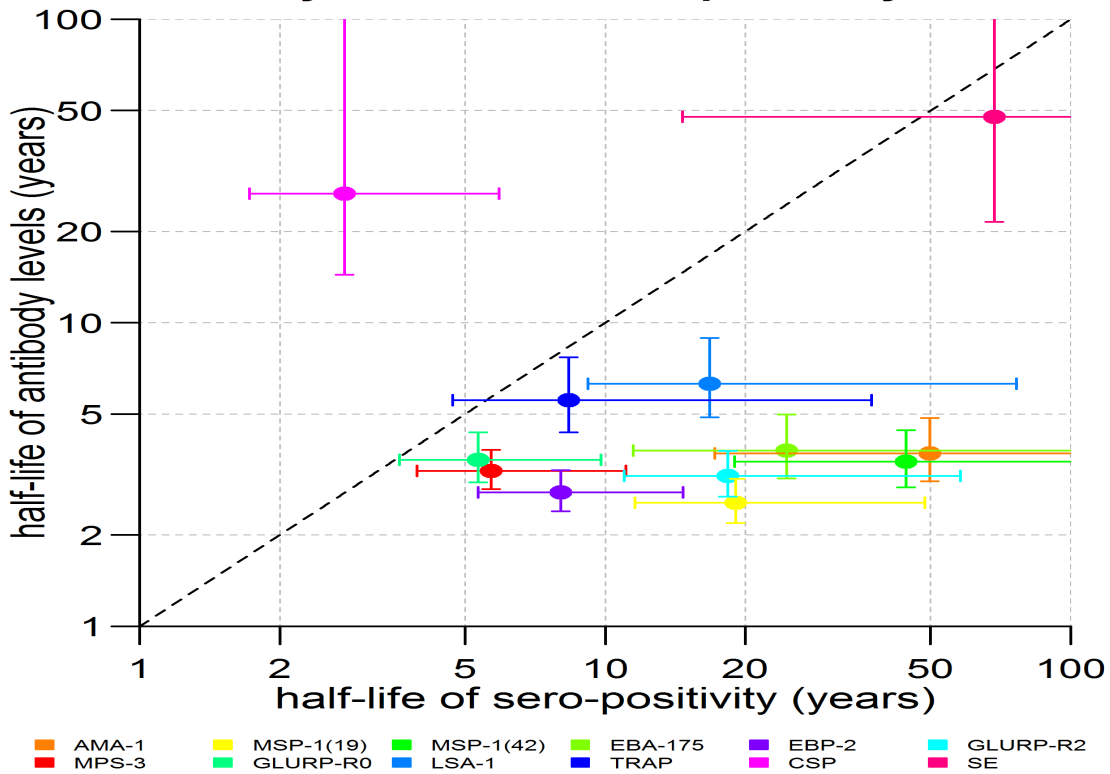

Supplement: tpmd190480.SD7.pdf [file tpmd190480.SD7.pdf]
